# Supplementary material for: The clock protein period 2 synchronizes mitotic expansion and decidual transformation of human endometrial stromal cells
Source: PubMed Central journal article supplement — FASEB J. 2015 Jan 8;29(4):1603–14. doi: 10.1096/fj.14-267195 (PMC4396614; doi:10.1096/fj.14-267195), 2015-01-08
Supplement: supp_fj.14-267195_Supplemental_Figure1.pdf [file supp_fj.14-267195_Supplemental_Figure1.pdf]

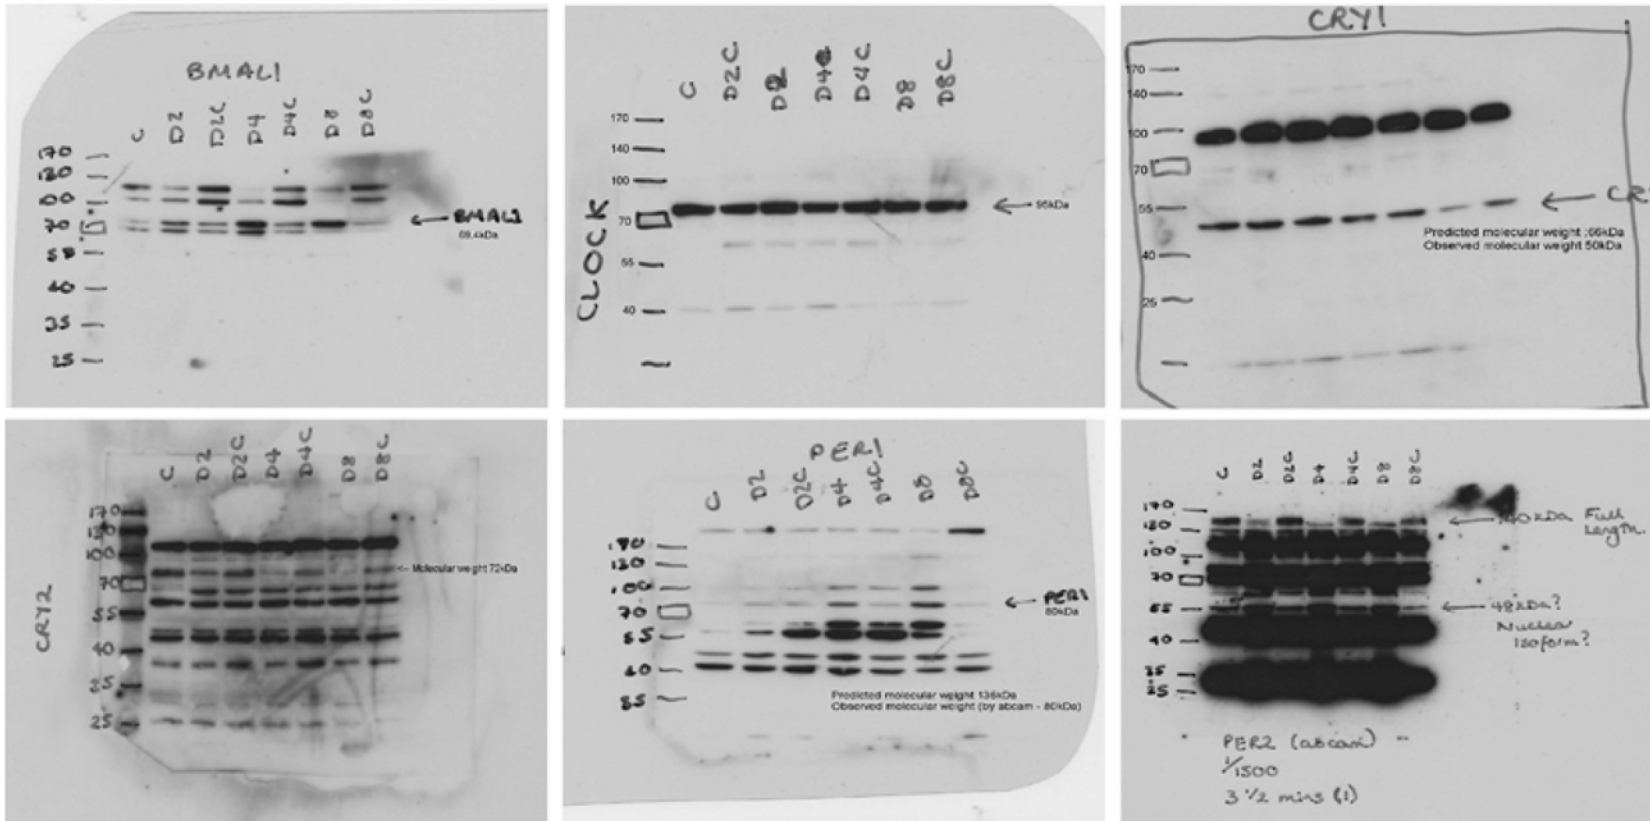

Supplementary Figure 1: Western blot analysis of 6 core clock genes from total cell lysates from undifferentiated HESCs and cells decidualized with 8-br-CAMP and MPA for 2, 4 or 8 days. Molecular weights are indicated on individual blots.
